# Supplementary material
Source: MDPI journal article supplement (https://www.mdpi.com/2227-9040/11/4/242)
Supplement: s1 [file s1]

## Supporting information

### calculations

In order to provide insight into the extraordinary capacitive performance of NiFe-MOF-8 electrodes, kinetic analyses were implemented for three materials prepared and synthesized with different reaction times. In general, the relationship between the supercapacitor current (*i*) and the scan rate (*v*) obeys a power law<sup>11</sup>.

$$I = av^b \quad (1)$$

where *a* and *b* are specific values, with diffusion control dominating when the value of *b* is 0.5; and capacitive control dominating when the value of *b* is 1<sup>12</sup>. Thus, the capacitive effect of non-diffusion control and the insertion process of diffusion control can be well distinguished based on the value of *b*.

The contribution of capacitance to the total capacity can be further estimated quantitatively according to the following equation<sup>13</sup>.

$$i = k_1v + k_2v^{1/2} \quad (2)$$

*i* - the current response at a specific potential *V*, *v* - the scan rate, *k*<sub>1</sub>*v* and *k*<sub>2</sub>*v*<sup>1/2</sup> -surface-controlled and diffusion-controlled currents.

By determining *k*<sub>1</sub> and *k*<sub>2</sub>, the contribution of diffusion control and surface capacitance processes to the current can be calculated<sup>14</sup>.

The relationship between peak current, scan rate coefficient in the diffusion rate control step is shown in the following equation<sup>15</sup>.

$$\frac{I_p}{v^{1/2}} = (2.69 \times 10^5)n^{3/2}SD_0^{1/2}C_0^0 \quad (3)$$

*I*<sub>p</sub> - peak current, A, *v*- scanning rate, *n* - number of electrons gained or lost, *S* - area of electrode material, cm<sup>2</sup>, *D*<sub>0</sub> - the diffusion coefficient of the reactant, Co<sup>0</sup> - initial concentration of reactant, mol cm<sup>-3</sup>.

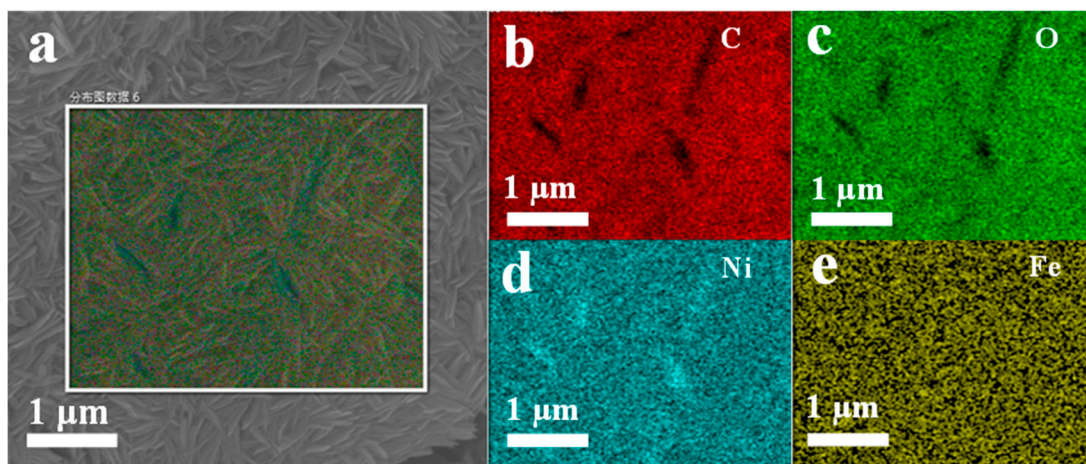

**Fig. S1:** EDS mapping images for C, O, Fe and Ni elements of NiFe-MOF-12 nanosheets.

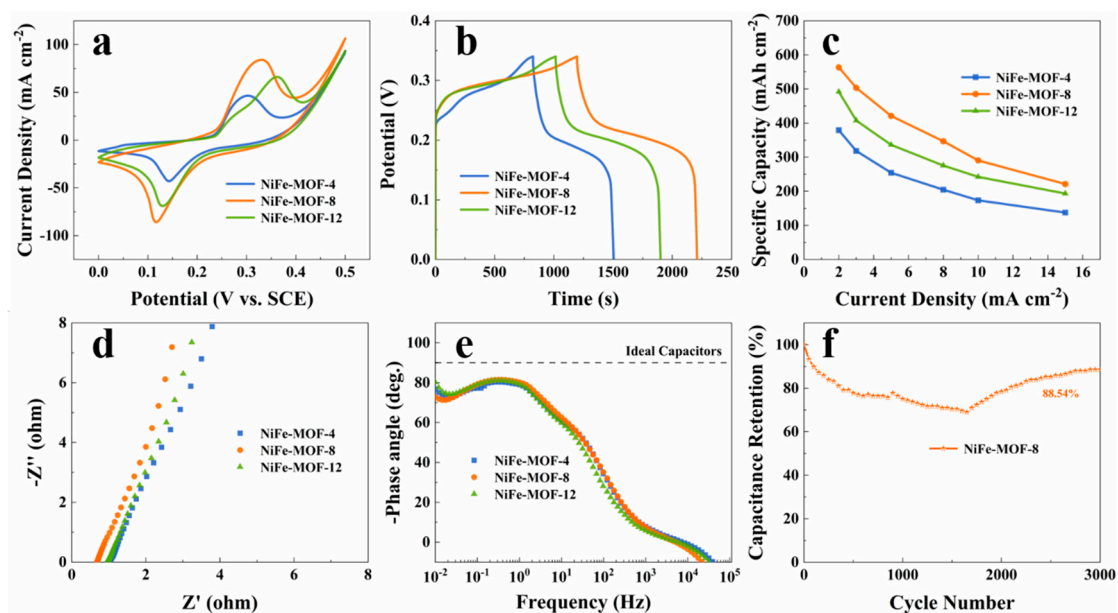

**Fig. S2:** Comparison of electrochemical properties of samples with different reaction times: (a) cyclic voltammetry (CV) curves at 5 mV s<sup>-1</sup> (b) galvanostatic charge-discharge (GCD) curves at 2 mA cm<sup>-2</sup> (c) specific capacitances derived from the discharge profiles at different current densities (d) Nyquist plots of impedance (e) phase angle versus frequency plots (f) cyclic stability test of NiFe-MOF-8.

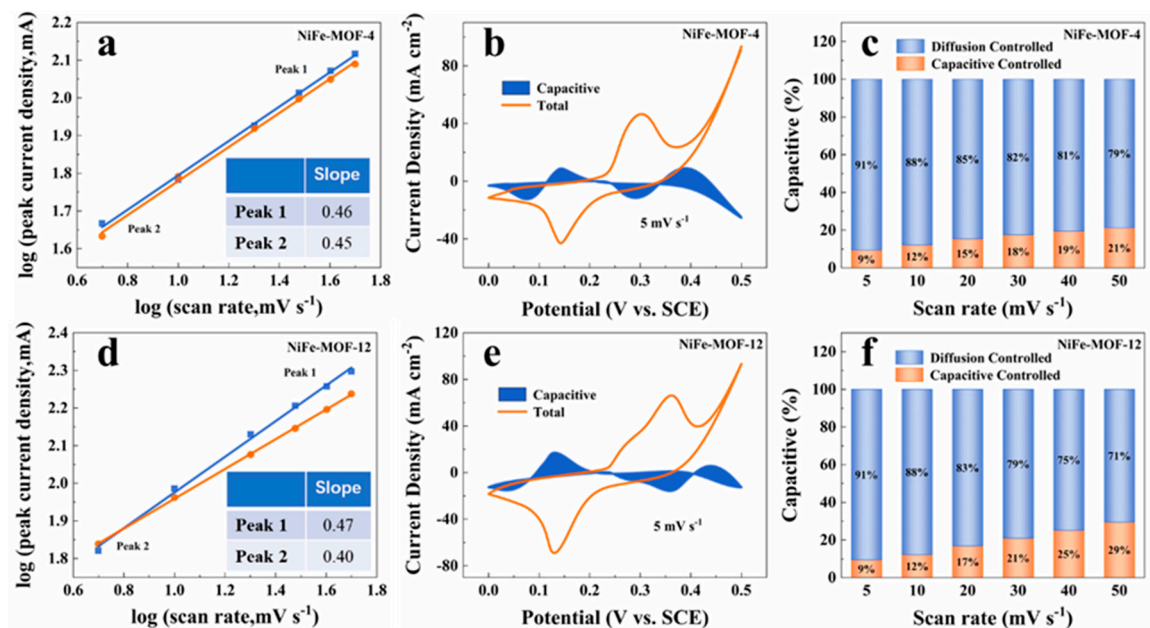

**Fig. S3:** NiFe-MOF-4 and NiFe-MOF-12: (a,d) Logarithmic relationship of peak current and scanning rate (b,e) contribution of the capacitive and diffusion process (c,f) comparison of contribution ratios between capacitive contribution and diffusion-controlled at different scan rates.

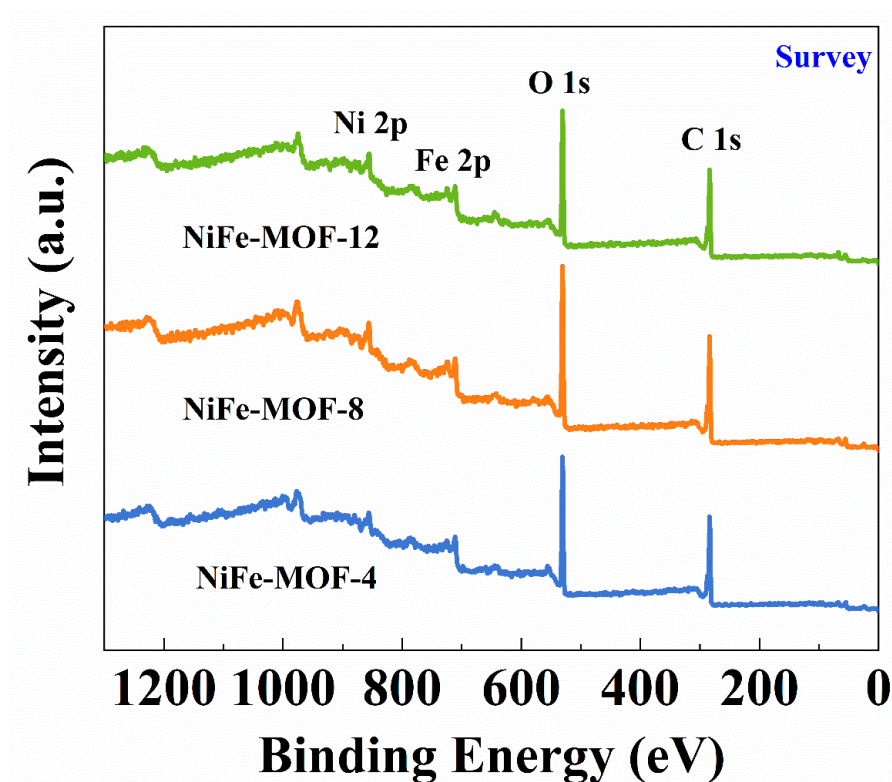

**Fig. S4:** XPS spectra of NiFe-MOF-X: survey spectrum

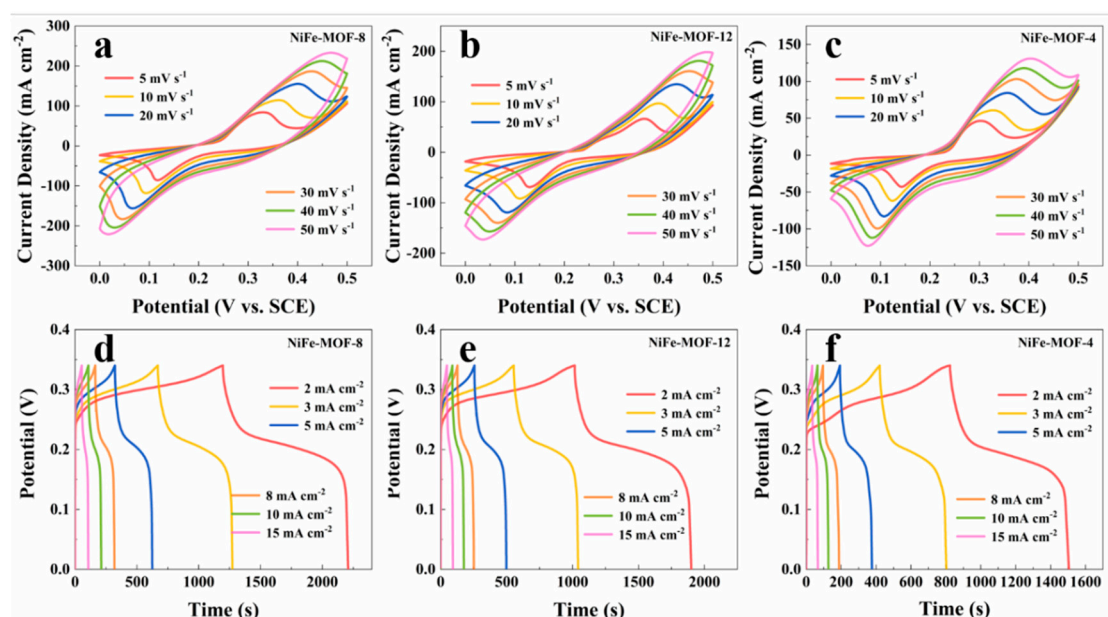

**Fig. S5.** Measurement of NiFe-MOF-X (X=4, 8, 12) with different reaction times in a three-electrode system: (a-c) CV curves at different scan rates (d-f) GCD curves at different current densities.

**Table S1** The comparison of hydrogen evolution reaction(HER) catalytic activities of Ni/Fe<sub>3</sub>-MOF and other metal catalysts at 10 mA cm<sup>-2</sup>.

| Electrode material          | Electrolyte | electrolyte                          | Overpotential (mV) | Reference |
|-----------------------------|-------------|--------------------------------------|--------------------|-----------|
| FeNiP                       | Nanotubes   | 1.0 M KOH                            | 182                | 1         |
| Co-NCNTFs                   | NF          | 1.0 M KOH                            | 141                | 2         |
| NiFe-LDH                    | NF          | 1.0 M NaOH                           | 210                | 3         |
| Fe-Ni@NC-CNTs               | —           | 1.0 M KOH                            | 202                | 4         |
| Ni@NC <sub>6</sub> -600     | —           | 1.0 M KOH                            | 181                | 5         |
| Ni-HP                       | —           | 1.0 M KOH                            | 215                | 6         |
| NiCoS <sub>4</sub>          | NF          | 1.0 M KOH                            | 169                | 7         |
| NiFe hyblrooxide nanosheets | —           | 1.0 M KOH                            | 189                | 8         |
| FeS/Fe <sub>3</sub> C@N-S-C | —           | 0.5 M H <sub>2</sub> SO <sub>4</sub> | 174                | 9         |
| UiO-66-NH <sub>2</sub> -Mo  | —           | 0.5 M H <sub>2</sub> SO <sub>4</sub> | 200                | 10        |
| Ni/Fe <sub>3</sub> -MOF     | NF          | 1.0 M KOH                            | 140                | This work |

**Reference**

- 1 C. Xuan, J. Wang, W. Xia, Z. Peng, Z. Wu, W. Lei, K. Xia, H. L. Xin and D. Wang, *ACS Appl Mater Interfaces*, 2017, 9, 26134-26142.
- 2 Q. Yuan, Y. Yu, Y. Gong and X. Bi, *ACS Appl Mater Interfaces*, 2020, 12, 3592-3602.
- 3 J. Luo, J. H. Im, M. T. Mayer, M. Schreier, M. K. Nazeeruddin, N. G. Park, S. D. Tilley, H. J. Fan and M. Gratzel, *Science*, 2014, 345, 1593-1596.
- 4 X. Zhao, P. Pachfule, S. Li, J. R. J. Simke, J. Schmidt and A. Thomas, *Angew Chem Int Ed Engl*, 2018, 57, 8921-8926.
- 5 N. Cheng, N. Wang, L. Ren, G. Casillas-Garcia, N. Liu, Y. Liu, X. Xu, W. Hao, S. X. Dou and Y. Du, *Carbon*, 2020, 163, 178-185.
- 6 H. Qiao, Y. Yang, X. Dai, H. Zhao, J. Yong, L. Yu, X. Luan, M. Cui, X. Zhang and X. Huang, *Electrochimica Acta*, 2019, 318, 430-439.
- 7 J. Yu, C. Lv, L. Zhao, L. Zhang, Z. Wang and Q. Liu, *Advanced Materials Interfaces*, 2018, 5.
- 8 X. Sun, Q. Shao, Y. Pi, J. Guo and X. Huang, *Journal of Materials Chemistry A*, 2017, 5, 7769-7775.
- 9 F. Kong, X. Fan, A. Kong, Z. Zhou, X. Zhang and Y. Shan, *Advanced Functional Materials*, 2018, 28, 1803973.
- 10 X. Dai, M. Liu, Z. Li, A. Jin, Y. Ma, X. Huang, H. Sun, H. Wang and X. Zhang, *The Journal of Physical Chemistry C*, 2016, 120, 12539-12548.
- 11 J. Yan, C. E. Ren, K. Maleski, C. B. Hatter, B. Anasori, P. Urbankowski, A. Sarycheva and Y. Gogotsi, *Advanced Functional Materials*, 2017, 27, 1701264.
- 12 V. Augustyn, J. Come, M. A. Lowe, J. W. Kim, P. L. Taberna, S. H. Tolbert, H. D. Abruña, P. Simon and B. Dunn, *Nat Mater*, 2013, 12, 518-522
- 13 K. A. Owusu, L. Qu, J. Li, Z. Wang, K. Zhao, C. Yang, K. M. Hercule, C. Lin, C. Shi, Q. Wei, L. Zhou and L. Mai, *Nat Commun*, 2017, 8, 14264.
- 14 M. B. Askari, P. Salarizadeh, A. Beheshti-Marnani and A. Di Bartolomeo, *Advanced Materials Interfaces*, 2021, 8, 2100149.
- 15 Z. Weng, Y. Su, D. W. Wang, F. Li, J. Du and H. M. Cheng, *Advanced Energy Materials*, 2011,

1, 917-922.
